# Supplementary material for: Desorption Electrospray Ionization (DESI) Mass Spectrometric Imaging of the Distribution of Rohitukine in the Seedling of Dysoxylum binectariferum Hook. F
Source: PubMed Central journal article supplement (PMC4928942; doi:10.1371/journal.pone.0158099), 2016-06-30
Supplement: pone.0158099.s002.pdf [file pone.0158099.s002.pdf]

| Sl. no | <i>m/z</i> obtained from DESI MS | <i>m/z</i> obtained from ESI MS (Orbitrap) | Calculated exact mass of the ion | Probable metabolite name | Probable chemical formula of the ion                            | ESI MS/MS fragmented ions OR Class of metabolite | Structure                                                                           | Tissue where metabolite localized                         | METLIN-ID |
|--------|----------------------------------|--------------------------------------------|----------------------------------|--------------------------|-----------------------------------------------------------------|--------------------------------------------------|-------------------------------------------------------------------------------------|-----------------------------------------------------------|-----------|
| 1      | 174.1                            | 174.1236                                   | 174.1237                         | Indospicine              | C <sub>7</sub> H <sub>15</sub> N <sub>3</sub> O <sub>2</sub> +H | 156.1, 116.1                                     | 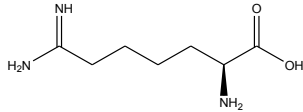 | Cotyledon<br>Cortex and endodermis, midrib and leaf veins | 3299      |
| 2      | 198.2                            | 198.1235                                   | 198.1237                         | Hercynine                | C <sub>9</sub> H <sub>15</sub> N <sub>3</sub> O <sub>2</sub> +H | 180.0, 154.0, 95.0                               |  | Endodermis, xylem, and phloem<br>Leaf margin              | 63493     |

|   |       |          |          |                    |                       |                        |                                                                                     |                                                   |  |
|---|-------|----------|----------|--------------------|-----------------------|------------------------|-------------------------------------------------------------------------------------|---------------------------------------------------|--|
| 3 | 306.2 | 306.1336 | 306.1335 | Rohitukine         | $C_{16}H_{19}NO_5+H$  | 288.0, 245.0,<br>222.0 | 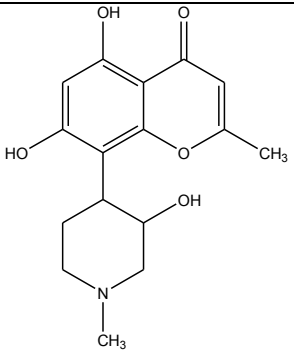 | Cotyledon<br>Cortex and<br>endodermis<br><br>Leaf |  |
| 4 | 322.2 | 322.1283 | 322.1285 | Rohitukine-N-oxide | $C_{16}H_{19}NO_6+H$  | 304.3, 276.2,<br>238.0 |  | Leaf blade                                        |  |
| 5 | 328.2 | 328.1155 | 328.1155 | Rohitukine         | $C_{16}H_{19}NO_5+Na$ | -                      | -                                                                                   | Cotyledon<br>Cortex and<br>endodermis<br><br>Leaf |  |

|   |       |          |          |                                  |                      |                               |                                                                                                                                                                                                                                                                                                                        |                               |  |
|---|-------|----------|----------|----------------------------------|----------------------|-------------------------------|------------------------------------------------------------------------------------------------------------------------------------------------------------------------------------------------------------------------------------------------------------------------------------------------------------------------|-------------------------------|--|
| 6 | 338.2 | 338.1599 | 338.1598 | Methoxylated rohitukine analogue | $C_{17}H_{23}NO_6+H$ | 306.2 and 288.0, 245.0, 222.0 | 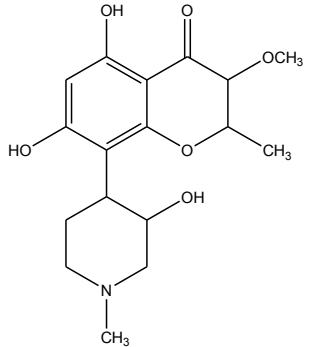 <p>The structure shows a central piperidine ring with a methyl group on the nitrogen. It is substituted at the 2-position with a 3-hydroxy-4-(4-hydroxy-6-hydroxyphenyl)-2-methoxy-4-oxo-1,2,3,4-tetrahydropyridin-6-yl group.</p> | Leaf                          |  |
| 7 | 348.2 | 348.1447 | 348.1442 | Rohitukine acetate               | $C_{18}H_{21}NO_6+H$ | 306.2, 288.0, 245.0           |  <p>The structure shows a central piperidine ring with a methyl group on the nitrogen. It is substituted at the 2-position with a 3-hydroxy-4-(4-hydroxy-6-methyl-2-oxo-1,2,3,4-tetrahydropyridin-6-yl)-2-acetoxyphenyl group.</p> | Cotyledon<br>Xylem and phloem |  |

|    |       |          |          |                                        |                           |                                     |                                                                                      |                                                |       |
|----|-------|----------|----------|----------------------------------------|---------------------------|-------------------------------------|--------------------------------------------------------------------------------------|------------------------------------------------|-------|
| 8  | 401.1 | 401.2083 | 401.2087 | 17beta-Hydroxyestr-4-en-3-one benzoate | $C_{25}H_{30}O_3+Na$      | Steroid ester                       | 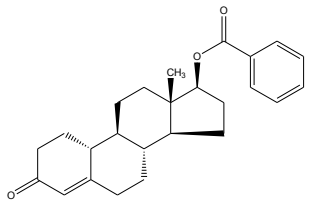  | Epidermis,<br>cortex, and<br>endodermis        | 70661 |
| 9  | 468.2 | 468.1865 | 468.1864 | Glycosylated rohitukine                | $C_{22}H_{29}NO_{10}+H$   | 306.2 and<br>288.0, 245.0,<br>222.0 |   | Cotyledon<br>Xylem and<br>phloem<br>Leaf blade |       |
| 10 | 490.2 | 490.1687 | 490.1684 | Bis-N-butyl phthalate                  | $C_{22}H_{29}NO_{10}+Na$  | Carbohydrates                       |  | Xylem and<br>phloem                            | 88062 |
| 11 | 610.9 | 611.2598 | 611.2600 | Protonated rohitukine dimer            | $C_{32}H_{38}N_2O_{10}+H$ | -                                   | -                                                                                    | Cotyledon<br>Cortex and                        |       |

|    |       |          |          |                                          |                         |                                     |                                                                                     |                                         |       |
|----|-------|----------|----------|------------------------------------------|-------------------------|-------------------------------------|-------------------------------------------------------------------------------------|-----------------------------------------|-------|
|    |       |          |          |                                          |                         |                                     |                                                                                     | endodermis,<br>midrib and<br>leaf veins |       |
| 12 | 527.3 | 527.1583 | 527.1583 | Maltotriose                              | $C_{18}H_{32}O_{16}+Na$ | 365.1 and<br>348.0, 204.0,<br>185.2 | 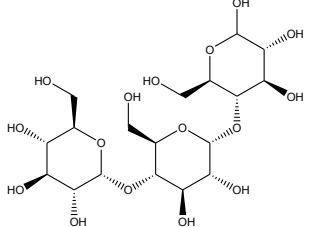 | Leaf blade                              | 3585  |
| 13 | 649.2 | 649.2127 | 649.2127 | Embigenin 2''-(2'''-<br>acetylramnoside) | $C_{31}H_{36}O_{15}+H$  | Flavonoids                          |  | Midrib and<br>leaf veins                | 49452 |
